# Supplementary material for: Population-based Risk of Psychiatric Disorders Associated with Recurrent CNVs
Source: PubMed Central journal article supplement — medRxiv. 2023 Sep 5:2023.09.04.23294975. Preprint. [Version 1] doi: 10.1101/2023.09.04.23294975 (PMC10602037; doi:10.1101/2023.09.04.23294975), 2023-09-05
Supplement: media-2.pdf [file media-2.pdf]

Supplementary Table 5: Comparison of Hazard ratios (HRs) with Odds ratios (ORs) associated with rCNVs across all the studied outcomes in iPSYCH2015 case-cohort. For sensitivity analysis, we computed rCNV-associated ORs with 95% confidence intervals (CI95%) using generalised linear models (GLMs) to compare with weighted Cox proportional HRs (see Method). ORs are only reported in case of corresponding valid HRs in our study.

| Locus    | Diagnosis              | Deletion         |        | Duplication       |          | Deletion          |        | Duplication       |          |
|----------|------------------------|------------------|--------|-------------------|----------|-------------------|--------|-------------------|----------|
|          |                        | HR [CI95%]       | P      | HR [CI95%]        | P        | OR [CI95%]        | P      | OR [CI95%]        | P        |
| TAR      | ADHD                   | 0.59 [0.18-1.87] | 0.37   | 1.76 [1.15-2.69]  | 0.0086   | 0.47 [0.13-1.39]  | 0.20   | 1.85 [1.23-2.79]  | 0.0034   |
| 1q21.1   | ADHD                   | 1.93 [0.92-4.07] | 0.083  | 2.65 [1.56-4.49]  | 2.90E-04 | 1.99 [0.99-4.1]   | 0.057  | 2.22 [1.37-3.64]  | 0.0012   |
| 2q11.2   | ADHD                   | 3.42 [0.88-13.2] | 0.075  | na.               | na.      | 2.45 [0.62-10.3]  | 0.20   | na.               | na.      |
| 2q13     | ADHD                   | 1.68 [0.83-3.36] | 0.15   | 1.43 [0.49-4.21]  | 0.51     | 1.24 [0.65-2.37]  | 0.51   | 1.18 [0.41-3.38]  | 0.75     |
| 2q21.1   | ADHD                   | 2.71 [0.69-10.6] | 0.15   | na.               | na.      | 2.52 [0.75-9.75]  | 0.15   | na.               | na.      |
| 10q11.23 | ADHD                   | 0.32 [0.07-1.52] | 0.15   | na.               | na.      | 0.31 [0.05-1.21]  | 0.14   | na.               | na.      |
| 13q12.12 | ADHD                   | 2.34 [0.82-6.68] | 0.11   | 2.65 [0.67-10.44] | 0.16     | 3.63 [1.21-12.12] | 0.025  | 1.33 [0.32-5.21]  | 0.68     |
| 15q11.2  | ADHD                   | 1.43 [1.14-1.8]  | 0.0021 | 1.42 [1.13-1.79]  | 0.0026   | 1.48 [1.18-1.84]  | 0.0005 | 1.32 [1.06-1.64]  | 0.015    |
| PWAS     | ADHD                   | na.              | na.    | 3.64 [1.04-12.8]  | 0.044    | na.               | na.    | 3.06 [1.03-10.19] | 0.051    |
| 15q13.3  | ADHD                   | 2.51 [1.09-5.78] | 0.031  | 1.77 [0.98-3.19]  | 0.057    | 2.47 [1.11-5.76]  | 0.029  | 1.55 [0.9-2.65]   | 0.11     |
| 16p13.11 | ADHD                   | 2.26 [1.37-3.73] | 0.0014 | 2.01 [1.43-2.81]  | 5.0E-05  | 1.99 [1.24-3.2]   | 0.0043 | 1.98 [1.44-2.74]  | 2.90E-05 |
| 16p12.1  | ADHD                   | 1.86 [1.22-2.84] | 0.0039 | 0.56 [0.24-1.33]  | 0.19     | 1.85 [1.25-2.74]  | 0.0022 | 0.56 [0.22-1.28]  | 0.19     |
| 16p11.2d | ADHD                   | 1.26 [0.55-2.88] | 0.58   | 1.57 [0.78-3.18]  | 0.21     | 1.03 [0.45-2.27]  | 0.95   | 1.69 [0.86-3.31]  | 0.12     |
| 16p11.2  | ADHD                   | 0.77 [0.36-1.61] | 0.48   | 2.63 [1.75-3.95]  | 3.3E-06  | 0.93 [0.42-1.92]  | 0.84   | 3.13 [2.13-4.65]  | 9.80E-09 |
| 17p12    | ADHD                   | 0.45 [0.18-1.15] | 0.095  | 0.69 [0.21-2.23]  | 0.53     | 0.41 [0.15-0.98]  | 0.061  | 0.71 [0.19-2.21]  | 0.57     |
| 17q12    | ADHD                   | 4.24 [1.29-13.9] | 0.017  | 4.19 [1.98-8.87]  | 0.0002   | 2.12 [0.72-6.56]  | 0.17   | 3.66 [1.85-7.65]  | 0.0003   |
| 22q11.2  | ADHD                   | 1.17 [0.49-2.8]  | 0.72   | 2.61 [1.67-4.09]  | 2.6E-05  | 1.48 [0.53-4.13]  | 0.45   | 2.58 [1.69-3.99]  | 1.40E-05 |
| 22q11.2b | ADHD                   | 1.81 [0.53-6.18] | 0.35   | 1.63 [0.55-4.83]  | 0.38     | 1.97 [0.6-6.49]   | 0.25   | 2.01 [0.7-5.92]   | 0.19     |
| TAR      | Any affective disorder | 0.9 [0.26-3.06]  | 0.86   | 1.37 [0.87-2.18]  | 0.18     | 1.01 [0.32-2.87]  | 0.99   | 1.4 [0.91-2.18]   | 0.13     |
| 1q21.1   | Any affective disorder | 2.13 [0.89-5.09] | 0.087  | 1.45 [0.76-2.77]  | 0.25     | 1.83 [0.85-4.1]   | 0.13   | 1.19 [0.65-2.15]  | 0.57     |
| 2q11.2   | Any affective disorder | 2.06 [0.57-7.43] | 0.27   | na.               | na.      | 3.03 [0.62-21.99] | 0.20   | na.               | na.      |
| 2q13     | Any affective disorder | 1.29 [0.56-2.99] | 0.56   | 0.73 [0.19-2.82]  | 0.65     | 0.85 [0.39-1.82]  | 0.69   | 0.67 [0.18-2.26]  | 0.52     |
| 2q21.1   | Any affective disorder | 1.51 [0.17-13.2] | 0.71   | 0.65 [0.17-2.53]  | 0.53     | 0.88 [0.11-5.15]  | 0.89   | 0.61 [0.15-2.12]  | 0.45     |
| 10q11.23 | Any affective disorder | 0.72 [0.21-2.48] | 0.60   | 1.4 [0.3-6.57]    | 0.67     | 0.57 [0.17-1.75]  | 0.34   | 0.85 [0.16-3.98]  | 0.83     |
| 13q12.12 | Any affective disorder | 0.36 [0.1-1.32]  | 0.12   | 3.03 [0.66-13.9]  | 0.15     | 0.44 [0.11-1.64]  | 0.22   | 1.99 [0.54-7.61]  | 0.30     |
| 15q11.2  | Any affective disorder | 1.15 [0.89-1.49] | 0.28   | 1.09 [0.84-1.4]   | 0.51     | 1.11 [0.88-1.41]  | 0.37   | 1.09 [0.86-1.38]  | 0.49     |
| PWAS     | Any affective disorder | na.              | na.    | 1.7 [0.29-10.1]   | 0.56     | na.               | na.    | 0.68 [0.12-3.49]  | 0.64     |
| 15q13.3  | Any affective disorder | 2.01 [0.79-5.13] | 0.14   | 1.48 [0.82-2.66]  | 0.19     | 1.67 [0.74-3.98]  | 0.22   | 1.53 [0.89-2.66]  | 0.13     |
| 16p13.11 | Any affective disorder | 1.14 [0.61-2.14] | 0.69   | 1.42 [0.97-2.06]  | 0.069    | 1.21 [0.7-2.08]   | 0.50   | 1.56 [1.1-2.21]   | 0.012    |
| 16p12.1  | Any affective disorder | 0.99 [0.6-1.62]  | 0.96   | 0.87 [0.41-1.85]  | 0.71     | 0.85 [0.54-1.35]  | 0.49   | 0.96 [0.46-1.97]  | 0.92     |
| 16p11.2d | Any affective disorder | 0.97 [0.37-2.54] | 0.95   | 1.2 [0.58-2.45]   | 0.63     | 0.91 [0.38-2.15]  | 0.84   | 1.23 [0.63-2.41]  | 0.55     |
| 16p11.2  | Any affective disorder | 0.45 [0.2-1.03]  | 0.057  | 0.99 [0.6-1.65]   | 0.98     | 0.43 [0.17-0.98]  | 0.054  | 1.1 [0.68-1.78]   | 0.71     |

|          |                        |                  |          |                  |         |
|----------|------------------------|------------------|----------|------------------|---------|
| 17p12    | Any affective disorder | 0.79 [0.35-1.77] | 0.57     | 0.52 [0.17-1.59] | 0.25    |
| 17q12    | Any affective disorder | 0.63 [0.08-5.11] | 0.68     | 1.56 [0.57-4.26] | 0.38    |
| 22q11.2  | Any affective disorder | 0.95 [0.28-3.24] | 0.93     | 0.98 [0.57-1.7]  | 0.95    |
| 22q11.2b | Any affective disorder | 1.03 [0.24-4.49] | 0.97     | 1.84 [0.66-5.16] | 0.25    |
| TAR      | Any iPSYCH disorder    | 0.68 [0.29-1.6]  | 0.38     | 1.48 [1.02-2.14] | 0.037   |
| 1q21.1   | Any iPSYCH disorder    | 2.12 [1.08-4.14] | 0.028    | 2.54 [1.58-4.08] | 0.0001  |
| 2q11.2   | Any iPSYCH disorder    | 2.76 [0.93-8.12] | 0.067    | 0.31 [0.05-1.9]  | 0.21    |
| 2q13     | Any iPSYCH disorder    | 1.28 [0.69-2.38] | 0.43     | 1.1 [0.43-2.82]  | 0.85    |
| 2q21.1   | Any iPSYCH disorder    | 2.34 [0.61-8.87] | 0.21     | 0.45 [0.14-1.45] | 0.18    |
| 10q11.23 | Any iPSYCH disorder    | 0.71 [0.28-1.78] | 0.47     | 1.63 [0.44-6.05] | 0.46    |
| 13q12.12 | Any iPSYCH disorder    | 0.71 [0.26-1.91] | 0.50     | 3.81 [1.25-11.6] | 0.019   |
| 15q11.2  | Any iPSYCH disorder    | 1.3 [1.07-1.58]  | 0.008    | 1.21 [1-1.47]    | 0.053   |
| PWAS     | Any iPSYCH disorder    | na.              | na.      | 11.3 [4.24-30.1] | 1.3E-06 |
| 15q13.3  | Any iPSYCH disorder    | 2.7 [1.31-5.56]  | 0.007    | 1.53 [0.94-2.5]  | 0.091   |
| 16p13.11 | Any iPSYCH disorder    | 1.75 [1.11-2.76] | 0.017    | 1.7 [1.27-2.27]  | 0.0003  |
| 16p12.1  | Any iPSYCH disorder    | 1.26 [0.86-1.84] | 0.24     | 0.81 [0.45-1.44] | 0.47    |
| 16p11.2d | Any iPSYCH disorder    | 1.23 [0.62-2.44] | 0.56     | 1.32 [0.73-2.4]  | 0.36    |
| 17p12    | Any iPSYCH disorder    | 0.61 [0.33-1.15] | 0.13     | 0.64 [0.27-1.51] | 0.31    |
| 22q11.2  | Any iPSYCH disorder    | 1.85 [0.83-4.14] | 0.13     | 1.85 [1.23-2.8]  | 0.0035  |
| 22q11.2b | Any iPSYCH disorder    | 0.64 [0.2-2.03]  | 0.37     | 1.58 [0.64-3.89] | 0.32    |
| TAR      | ASD                    | 0.64 [0.2-2.03]  | 0.44     | 1.49 [0.95-2.34] | 0.084   |
| 1q21.1   | ASD                    | 2.37 [1.16-4.86] | 0.018    | 4.03 [2.44-6.64] | 4.6E-08 |
| 2q11.2   | ASD                    | 2.44 [0.54-11]   | 0.25     | na.              | na.     |
| 2q13     | ASD                    | 0.92 [0.4-2.08]  | 0.84     | 0.97 [0.27-3.45] | 0.97    |
| 2q21.1   | ASD                    | 2.49 [0.64-9.8]  | 0.19     | 0.61 [0.12-3.14] | 0.55    |
| 10q11.23 | ASD                    | 0.74 [0.22-2.51] | 0.63     | 1.81 [0.35-9.35] | 0.48    |
| 13q12.12 | ASD                    | 0.77 [0.15-3.98] | 0.75     | 5 [1.47-16.99]   | 0.010   |
| 15q11.2  | ASD                    | 1.45 [1.15-1.84] | 0.0018   | 1.07 [0.82-1.38] | 0.63    |
| PWAS     | ASD                    | na.              | na.      | 20.8 [7.86-55]   | 9.6E-10 |
| 15q13.3  | ASD                    | 3.74 [1.66-8.42] | 0.0014   | 1.59 [0.85-2.98] | 0.15    |
| 16p13.11 | ASD                    | 1.92 [1.12-3.31] | 0.018    | 1.84 [1.30-2.61] | 0.0006  |
| 16p12.1  | ASD                    | 1.11 [0.68-1.83] | 0.68     | 1.00 [0.46-2.19] | 1       |
| 16p11.2d | ASD                    | 0.94 [0.37-2.39] | 0.89     | 1.26 [0.57-2.79] | 0.57    |
| 16p11.2  | ASD                    | 3.07 [1.75-5.36] | 8.4E-05  | 2.04 [1.33-3.15] | 0.0012  |
| 17p12    | ASD                    | 0.81 [0.36-1.82] | 0.61     | 0.64 [0.17-2.41] | 0.51    |
| 17q12    | ASD                    | 7.79 [2.71-22.4] | 1.40E-04 | 3.12 [1.37-7.08] | 0.0065  |
| 22q11.2  | ASD                    | 1.5 [0.59-3.84]  | 0.39     | 2.63 [1.66-4.16] | 3.4E-05 |
| 22q11.2b | ASD                    | 2.34 [0.67-8.13] | 0.18     | 0.92 [0.25-3.30] | 0.89    |

|                   |          |                    |          |
|-------------------|----------|--------------------|----------|
| 0.74 [0.34-1.6]   | 0.44     | 0.64 [0.2-1.89]    | 0.43     |
| 0.64 [0.09-3.14]  | 0.62     | 1.98 [0.86-4.76]   | 0.11     |
| 0.83 [0.26-2.51]  | 0.74     | 1.06 [0.62-1.8]    | 0.82     |
| 1.45 [0.39-5.95]  | 0.59     | 1.67 [0.6-4.85]    | 0.33     |
| 0.54 [0.24-1.21]  | 0.13     | 1.61 [1.15-2.29]   | 0.0074   |
| 2.36 [1.3-4.63]   | 0.0076   | 2.32 [1.53-3.66]   | 0.0002   |
| 3.99 [1.12-25.35] | 0.067    | 0.26 [0.04-1.34]   | 0.12     |
| 0.98 [0.57-1.72]  | 0.94     | 1.1 [0.48-2.7]     | 0.83     |
| 1.87 [0.67-6.6]   | 0.27     | 0.39 [0.13-1.14]   | 0.086    |
| 0.64 [0.28-1.52]  | 0.3      | 1.13 [0.36-4.2]    | 0.84     |
| 1.15 [0.42-3.63]  | 0.79     | 2.03 [0.8-6.16]    | 0.16     |
| 1.35 [1.13-1.61]  | 0.0012   | 1.13 [0.95-1.36]   | 0.16     |
| na.               | na.      | 6.42 [2.6-21.36]   | 0.0004   |
| 2.69 [1.43-5.62]  | 0.0042   | 1.38 [0.9-2.16]    | 0.15     |
| 1.63 [1.1-2.48]   | 0.019    | 1.73 [1.33-2.3]    | 7.70E-05 |
| 1.19 [0.86-1.69]  | 0.30     | 0.86 [0.48-1.59]   | 0.62     |
| 1.13 [0.62-2.14]  | 0.71     | 1.39 [0.82-2.45]   | 0.23     |
| 0.64 [0.35-1.16]  | 0.13     | 0.73 [0.33-1.71]   | 0.46     |
| 2.04 [0.94-5.07]  | 0.093    | 2 [1.37-3]         | 0.0005   |
| 1.98 [0.78-6.01]  | 0.18     | 1.53 [0.68-3.88]   | 0.33     |
| 0.5 [0.13-1.52]   | 0.25     | 1.61 [1.02-2.52]   | 0.04     |
| 2.77 [1.3-6.12]   | 0.0092   | 4.1 [2.52-6.84]    | 2.80E-08 |
| 1.38 [0.25-6.94]  | 0.70     | na.                | na.      |
| 0.8 [0.33-1.76]   | 0.59     | 0.96 [0.24-3.32]   | 0.95     |
| 2.16 [0.6-8.59]   | 0.24     | 0.56 [0.08-2.38]   | 0.47     |
| 0.81 [0.21-2.57]  | 0.73     | 1.82 [0.34-8.74]   | 0.45     |
| 0.86 [0.11-4.39]  | 0.87     | 2.66 [0.8-9.42]    | 0.11     |
| 1.52 [1.2-1.92]   | 0.0005   | 0.94 [0.72-1.21]   | 0.62     |
| na.               | na.      | 19.25 [7.52-65.35] | 3.70E-08 |
| 4.64 [2.15-10.66] | 0.0001   | 1.51 [0.81-2.76]   | 0.18     |
| 1.65 [0.97-2.81]  | 0.064    | 1.76 [1.24-2.49]   | 0.0015   |
| 1.1 [0.67-1.79]   | 0.69     | 0.94 [0.41-2.02]   | 0.88     |
| 0.84 [0.31-2.11]  | 0.73     | 1.28 [0.56-2.8]    | 0.55     |
| 3.9 [2.22-7.03]   | 3.20E-06 | 2.52 [1.61-3.96]   | 5.30E-05 |
| 0.74 [0.31-1.65]  | 0.48     | 0.59 [0.13-2.12]   | 0.45     |
| 3.86 [1.52-10.6]  | 0.0056   | 3.04 [1.35-7.04]   | 0.0079   |
| 1.53 [0.57-4.09]  | 0.39     | 2.65 [1.67-4.24]   | 4.30E-05 |
| 2.55 [0.74-8.8]   | 0.13     | 1.12 [0.29-3.85]   | 0.86     |

|          |                         |                   |          |                   |          |
|----------|-------------------------|-------------------|----------|-------------------|----------|
| 1q21.1   | Bipolar disorder        | 3.52 [0.88-14.1]  | 0.076    | 1.63 [0.37-7.32]  | 0.52     |
| 15q11.2  | Bipolar disorder        | 0.63 [0.3-1.31]   | 0.22     | 1.26 [0.72-2.20]  | 0.41     |
| 15q13.3  | Bipolar disorder        | na.               | na.      | 0.85 [0.19-3.79]  | 0.84     |
| 16p13.11 | Bipolar disorder        | 2.83 [1.11-7.23]  | 0.029    | 0.8 [0.28-2.27]   | 0.67     |
| 16p12.1  | Bipolar disorder        | 1.62 [0.65-4.03]  | 0.30     | na.               | na.      |
| 16p11.2d | Bipolar disorder        | na.               | na.      | 1.89 [0.51-6.93]  | 0.34     |
| 16p11.2  | Bipolar disorder        | na.               | na.      | 0.53 [0.13-2.28]  | 0.40     |
| 17q12    | Bipolar disorder        | na.               | na.      | 2.15 [0.39-11.8]  | 0.38     |
| TAR      | Epilepsy                | na.               | na.      | 1.49 [0.65-3.42]  | 0.34     |
| 1q21.1   | Epilepsy                | 1.63 [0.41-6.47]  | 0.49     | 1.79 [0.66-4.88]  | 0.25     |
| 2q11.2   | Epilepsy                | 9.52 [2.42-37.4]  | 0.0013   | na.               | na.      |
| 2q13     | Epilepsy                | 0.64 [0.09-4.69]  | 0.66     | na.               | na.      |
| 2q21.1   | Epilepsy                | 4.17 [0.48-36.1]  | 0.2      | na.               | na.      |
| 10q11.23 | Epilepsy                | na.               | na.      | 3.15 [0.36-27.8]  | 0.30     |
| 13q12.12 | Epilepsy                | 3.2 [0.65-15.8]   | 0.15     | 3.24 [0.59-17.7]  | 0.17     |
| 15q11.2  | Epilepsy                | 1.90 [1.29-2.79]  | 0.001    | 0.91 [0.53-1.55]  | 0.72     |
| PWAS     | Epilepsy                | na.               | na.      | 15.1 [7.38-30.9]  | 1.1E-13  |
| 15q13.3  | Epilepsy                | 7.33 [3.32-16.2]  | 8.1E-07  | 1.70 [0.62-4.62]  | 0.30     |
| 16p13.11 | Epilepsy                | 10.0 [6.60-15.2]  | 3.2E-27  | 0.50 [0.16-1.56]  | 0.23     |
| 16p12.1  | Epilepsy                | 1.64 [0.76-3.56]  | 0.21     | 0.63 [0.09-4.65]  | 0.65     |
| 16p11.2d | Epilepsy                | 5.26 [2.17-12.8]  | 2.40E-04 | 1.20 [0.28-5.07]  | 0.81     |
| 16p11.2  | Epilepsy                | 5.47 [2.59-11.6]  | 8.7E-06  | 2.35 [1.20-4.62]  | 0.013    |
| 17p12    | Epilepsy                | na.               | na.      | 3.35 [1.00-11.2]  | 0.050    |
| 17q12    | Epilepsy                | na.               | na.      | 2.01 [0.48-8.45]  | 0.34     |
| 22q11.2  | Epilepsy                | 11.4 [5.36-24.4]  | 2.8E-10  | 1.97 [0.85-4.60]  | 0.12     |
| 22q11.2b | Epilepsy                | 6.38 [2.03-20.1]  | 0.0015   | 1.48 [0.20-11.2]  | 0.70     |
| TAR      | Intellectual disability | 1.18 [0.26-5.29]  | 0.83     | 1.18 [0.55-2.51]  | 0.67     |
| 1q21.1   | Intellectual disability | 5.38 [2.40-12.09] | 4.6E-05  | 3.14 [1.59-6.20]  | 9.90E-04 |
| 2q11.2   | Intellectual disability | 13.43 [2.97-60.7] | 7.40E-04 | na.               | na.      |
| 2q13     | Intellectual disability | 1.54 [0.52-4.56]  | 0.44     | 0.83 [0.10-6.68]  | 0.86     |
| 2q21.1   | Intellectual disability | 4.67 [1.27-17.2]  | 0.021    | 2.05 [0.41-10.1]  | 0.38     |
| 10q11.23 | Intellectual disability | 0.67 [0.08-5.29]  | 0.70     | 1.97 [0.22-17.72] | 0.54     |
| 13q12.12 | Intellectual disability | 2.4 [0.48-12.1]   | 0.29     | 2.09 [0.25-17.3]  | 0.49     |
| 15q11.2  | Intellectual disability | 1.46 [1.02-2.07]  | 0.038    | 1.25 [0.86-1.83]  | 0.24     |
| PWAS     | Intellectual disability | na.               | na.      | 46.5 [20.1-108]   | 3.5E-19  |
| 15q13.3  | Intellectual disability | 10.4 [5.03-21.5]  | 2.7E-10  | 2.28 [1.04-5]     | 0.041    |
| 16p13.11 | Intellectual disability | 6.12 [3.63-10.33] | 1.10E-11 | 2.04 [1.24-3.35]  | 0.0051   |
| 16p12.1  | Intellectual disability | 1.49 [0.75-2.96]  | 0.25     | 1.24 [0.36-4.26]  | 0.73     |

|                   |          |                   |          |
|-------------------|----------|-------------------|----------|
| 3.48 [0.75-11.85] | 0.067    | 1.3 [0.21-4.52]   | 0.72     |
| 0.65 [0.29-1.26]  | 0.25     | 1.23 [0.68-2.04]  | 0.46     |
| na.               | na.      | 0.86 [0.14-2.99]  | 0.84     |
| 2.86 [1.1-6.58]   | 0.02     | 0.8 [0.24-1.98]   | 0.67     |
| 1.65 [0.61-3.71]  | 0.27     | na.               | na.      |
| na.               | na.      | 1.92 [0.44-5.91]  | 0.31     |
| na.               | na.      | 0.6 [0.1-2.02]    | 0.49     |
| na.               | na.      | 2.29 [0.33-9.86]  | 0.31     |
| na.               | na.      | 0.99 [0.39-2.06]  | 0.99     |
| 1.18 [0.29-3.2]   | 0.79     | 0.68 [0.21-1.63]  | 0.45     |
| 3.39 [0.53-12.3]  | 0.11     | na.               | na.      |
| 0.51 [0.03-2.33]  | 0.50     | na.               | na.      |
| 3.49 [0.54-12.73] | 0.10     | na.               | na.      |
| na.               | na.      | 2.39 [0.13-12.34] | 0.40     |
| 3.65 [0.57-13.14] | 0.088    | 2.49 [0.39-8.66]  | 0.22     |
| 1.69 [1.17-2.35]  | 0.0031   | 0.73 [0.41-1.19]  | 0.24     |
| na.               | na.      | 3.73 [1.67-7.5]   | 0.0005   |
| 3.45 [1.5-6.91]   | 0.0013   | 1.62 [0.63-3.44]  | 0.26     |
| 9.3 [6.05-13.92]  | 6.10E-26 | 0.35 [0.11-0.84]  | 0.04     |
| 1.39 [0.62-2.67]  | 0.37     | 0.68 [0.04-3.16]  | 0.70     |
| 4.13 [1.56-9.17]  | 0.0014   | 0.83 [0.14-2.68]  | 0.80     |
| 4.06 [2.07-7.31]  | 1.10E-05 | 1.4 [0.69-2.54]   | 0.30     |
| na.               | na.      | 4.34 [1.01-12.88] | 0.019    |
| na.               | na.      | 0.84 [0.14-2.71]  | 0.81     |
| 7.43 [3.11-15.92] | 1.10E-06 | 1.18 [0.5-2.35]   | 0.67     |
| 4.01 [0.93-12]    | 0.028    | 2.04 [0.33-6.9]   | 0.34     |
| 1.45 [0.21-5.8]   | 0.64     | 0.76 [0.33-1.49]  | 0.46     |
| 2.99 [1.41-5.83]  | 0.0023   | 1.1 [0.57-1.96]   | 0.75     |
| 3.79 [0.82-12.83] | 0.05     | na.               | na.      |
| 1.24 [0.36-3.26]  | 0.69     | 0.85 [0.05-4.14]  | 0.87     |
| 2.76 [0.61-9.03]  | 0.13     | 4.58 [0.62-20.17] | 0.075    |
| 1.08 [0.06-5.41]  | 0.94     | 1.95 [0.1-10.57]  | 0.53     |
| 2.32 [0.33-9.67]  | 0.31     | 0.69 [0.04-3.52]  | 0.73     |
| 1.14 [0.8-1.58]   | 0.45     | 1.09 [0.74-1.55]  | 0.66     |
| na.               | na.      | 6.85 [3.7-12.56]  | 5.40E-10 |
| 6.9 [3.72-12.32]  | 2.00E-10 | 1.47 [0.63-2.98]  | 0.33     |
| 4.24 [2.58-6.72]  | 3.20E-09 | 1.15 [0.69-1.8]   | 0.56     |
| 1.11 [0.53-2.07]  | 0.75     | 1.52 [0.36-4.33]  | 0.50     |

|          |                           |                  |          |                  |         |
|----------|---------------------------|------------------|----------|------------------|---------|
| 16p11.2d | Intellectual disability   | 2.76 [1.07-7.11] | 0.036    | 1.86 [0.69-5.01] | 0.22    |
| 16p11.2  | Intellectual disability   | 5.14 [2.67-9.91] | 1.0E-06  | 4.43 [2.76-7.09] | 5.9E-10 |
| 17p12    | Intellectual disability   | 0.33 [0.04-2.49] | 0.28     | 2.80 [0.88-8.86] | 0.080   |
| 17q12    | Intellectual disability   | 16.1 [5.90-43.8] | 5.60E-08 | 2.96 [1.06-8.25] | 0.038   |
| 22q11.2  | Intellectual disability   | 18.5 [7.98-42.7] | 9.6E-12  | 3.80 [2.15-6.71] | 4.4E-06 |
| 22q11.2b | Intellectual disability   | 1.66 [0.20-13.8] | 0.64     | na.              | na.     |
| TAR      | Major depressive disorder | 0.96 [0.28-3.28] | 0.95     | 1.45 [0.92-2.31] | 0.11    |
| 1q21.1   | Major depressive disorder | 2.08 [0.86-5.04] | 0.10     | 1.43 [0.74-2.75] | 0.28    |
| 2q11.2   | Major depressive disorder | 2.18 [0.61-7.86] | 0.23     | na.              | na.     |
| 2q13     | Major depressive disorder | 1.39 [0.6-3.22]  | 0.44     | 0.79 [0.2-3.04]  | 0.73    |
| 2q21.1   | Major depressive disorder | na.              | na.      | 0.52 [0.12-2.29] | 0.39    |
| 10q11.23 | Major depressive disorder | 0.77 [0.22-2.68] | 0.69     | 1 [0.18-5.66]    | 1.00    |
| 13q12.12 | Major depressive disorder | 0.39 [0.11-1.42] | 0.15     | 2.67 [0.56-12.8] | 0.22    |
| 15q11.2  | Major depressive disorder | 1.17 [0.91-1.52] | 0.22     | 1.07 [0.82-1.38] | 0.62    |
| PWAS     | Major depressive disorder | na.              | na.      | 1.84 [0.31-10.9] | 0.50    |
| 15q13.3  | Major depressive disorder | 2.16 [0.84-5.5]  | 0.11     | 1.54 [0.86-2.78] | 0.15    |
| 16p13.11 | Major depressive disorder | 1.06 [0.56-2.03] | 0.85     | 1.38 [0.94-2.01] | 0.10    |
| 16p12.1  | Major depressive disorder | 0.91 [0.54-1.52] | 0.71     | 0.86 [0.4-1.87]  | 0.71    |
| 16p11.2d | Major depressive disorder | 1.04 [0.4-2.73]  | 0.94     | 1.17 [0.56-2.42] | 0.67    |
| 16p11.2  | Major depressive disorder | 0.42 [0.18-1]    | 0.049    | 1.04 [0.63-1.74] | 0.87    |
| 17p12    | Major depressive disorder | 0.85 [0.38-1.91] | 0.70     | 0.55 [0.18-1.71] | 0.30    |
| 17q12    | Major depressive disorder | na.              | na.      | 1.47 [0.53-4.07] | 0.46    |
| 22q11.2  | Major depressive disorder | 1.03 [0.3-3.52]  | 0.96     | 1.02 [0.59-1.77] | 0.94    |
| 22q11.2b | Major depressive disorder | 1.11 [0.25-4.81] | 0.89     | 1.32 [0.43-4.08] | 0.63    |
| TAR      | Schizophrenia             | na.              | na.      | 1.5 [0.77-2.93]  | 0.23    |
| 1q21.1   | Schizophrenia             | 1.75 [0.52-5.84] | 0.36     | 2.36 [0.97-5.71] | 0.058   |
| 2q11.2   | Schizophrenia             | 7.77 [1.25-48.2] | 0.028    | na.              | na.     |
| 2q13     | Schizophrenia             | 1.39 [0.37-5.18] | 0.63     | 1.63 [0.31-8.59] | 0.57    |
| 10q11.23 | Schizophrenia             | 1.3 [0.25-6.66]  | 0.76     | na.              | na.     |
| 13q12.12 | Schizophrenia             | na.              | na.      | 12.7 [2.17-74.1] | 0.0048  |
| 15q11.2  | Schizophrenia             | 1.29 [0.88-1.88] | 0.19     | 1.25 [0.84-1.87] | 0.27    |
| PWAS     | Schizophrenia             | na.              | na.      | 6.88 [0.95-49.8] | 0.056   |
| 15q13.3  | Schizophrenia             | 3.28 [1.02-10.6] | 0.047    | 1.3 [0.5-3.37]   | 0.59    |
| 16p13.11 | Schizophrenia             | 1.77 [0.78-4.01] | 0.17     | 2.05 [1.22-3.45] | 0.0069  |
| 16p12.1  | Schizophrenia             | 1.34 [0.64-2.8]  | 0.44     | 0.65 [0.15-2.87] | 0.56    |
| 16p11.2d | Schizophrenia             | 2.42 [0.78-7.52] | 0.13     | 2.38 [0.95-5.91] | 0.063   |
| 16p11.2  | Schizophrenia             | 0.57 [0.13-2.5]  | 0.45     | 1.22 [0.59-2.52] | 0.58    |
| 17p12    | Schizophrenia             | na.              | na.      | 2.38 [0.69-8.2]  | 0.17    |

|                   |          |                   |          |
|-------------------|----------|-------------------|----------|
| 2.94 [1.08-6.73]  | 0.019    | 1.52 [0.52-3.57]  | 0.38     |
| 3.69 [2.02-6.37]  | 7.70E-06 | 2.65 [1.7-4.01]   | 8.30E-06 |
| 0.43 [0.02-2.08]  | 0.41     | 4.66 [1.28-13.28] | 0.0082   |
| 5.66 [2.34-12.77] | 5.10E-05 | 1.23 [0.42-2.87]  | 0.67     |
| 31.79 [15.7-65.8] | 1.60E-21 | 1.79 [1.03-2.92]  | 0.028    |
| 0.71 [0.04-3.57]  | 0.75     | na.               | na.      |
| 1.07 [0.35-3.06]  | 0.90     | 1.48 [0.96-2.3]   | 0.08     |
| 1.7 [0.77-3.87]   | 0.19     | 1.23 [0.67-2.24]  | 0.51     |
| 3.2 [0.66-23.16]  | 0.18     | na.               | na.      |
| 0.93 [0.42-1.98]  | 0.86     | 0.71 [0.19-2.4]   | 0.59     |
| na.               | na.      | 0.51 [0.11-1.91]  | 0.34     |
| 0.62 [0.18-1.87]  | 0.41     | 0.63 [0.08-3.36]  | 0.60     |
| 0.48 [0.12-1.77]  | 0.27     | 1.7 [0.42-6.84]   | 0.44     |
| 1.14 [0.9-1.44]   | 0.29     | 1.05 [0.83-1.34]  | 0.68     |
| na.               | na.      | 0.73 [0.13-3.71]  | 0.70     |
| 1.79 [0.79-4.25]  | 0.17     | 1.57 [0.91-2.74]  | 0.11     |
| 1.14 [0.65-1.99]  | 0.65     | 1.55 [1.09-2.22]  | 0.016    |
| 0.77 [0.48-1.24]  | 0.29     | 0.96 [0.45-1.99]  | 0.91     |
| 1.01 [0.42-2.39]  | 0.98     | 1.22 [0.62-2.42]  | 0.57     |
| 0.4 [0.15-0.94]   | 0.044    | 1.16 [0.71-1.87]  | 0.56     |
| 0.82 [0.37-1.77]  | 0.60     | 0.68 [0.22-2.02]  | 0.50     |
| na.               | na.      | 1.78 [0.75-4.37]  | 0.19     |
| 0.89 [0.27-2.68]  | 0.83     | 1.11 [0.65-1.89]  | 0.70     |
| 1.54 [0.41-6.33]  | 0.52     | 1.09 [0.33-3.44]  | 0.88     |
| na.               | na.      | 1.64 [0.81-3.13]  | 0.15     |
| 1.65 [0.43-5.13]  | 0.42     | 2.52 [1.02-5.58]  | 0.031    |
| 7.75 [1.32-45.64] | 0.018    | na.               | na.      |
| 1.27 [0.28-3.99]  | 0.72     | 2.07 [0.3-9.48]   | 0.39     |
| 1.18 [0.17-4.96]  | 0.84     | na.               | na.      |
| na.               | na.      | 7.08 [1.33-31.34] | 0.012    |
| 1.36 [0.92-1.95]  | 0.11     | 1.2 [0.8-1.76]    | 0.36     |
| na.               | na.      | 7.64 [1.41-37.46] | 0.012    |
| 3.33 [1.01-9.69]  | 0.033    | 1.27 [0.45-3.06]  | 0.62     |
| 1.85 [0.77-4.02]  | 0.14     | 1.95 [1.15-3.22]  | 0.011    |
| 1.3 [0.59-2.58]   | 0.49     | 0.67 [0.1-2.37]   | 0.59     |
| 2.3 [0.7-6.54]    | 0.14     | 2.66 [1.05-6.19]  | 0.028    |
| 0.61 [0.1-2.14]   | 0.51     | 1.36 [0.63-2.71]  | 0.40     |
| na.               | na.      | 3.21 [0.84-10.25] | 0.06     |

|          |                                 |                  |        |                  |        |
|----------|---------------------------------|------------------|--------|------------------|--------|
| 17q12    | Schizophrenia                   | 5.38 [0.61-47.2] | 0.13   | 3.25 [0.98-10.7] | 0.054  |
| 22q11.2  | Schizophrenia                   | 3.18 [0.92-10.9] | 0.067  | 2.02 [0.99-4.12] | 0.053  |
| 22q11.2b | Schizophrenia                   | na.              | na.    | 2.56 [0.59-11]   | 0.21   |
| TAR      | Schizophrenia spectrum disorder | 1.63 [0.45-5.83] | 0.45   | 1.02 [0.56-1.86] | 0.95   |
| 1q21.1   | Schizophrenia spectrum disorder | 1.78 [0.68-4.69] | 0.24   | 2.7 [1.37-5.33]  | 0.0042 |
| 2q11.2   | Schizophrenia spectrum disorder | 4.75 [1.07-21.1] | 0.041  | na.              | na.    |
| 2q13     | Schizophrenia spectrum disorder | 1.58 [0.59-4.19] | 0.36   | 1.23 [0.29-5.18] | 0.78   |
| 2q21.1   | Schizophrenia spectrum disorder | 2.5 [0.28-22.8]  | 0.42   | na.              | na.    |
| 10q11.23 | Schizophrenia spectrum disorder | 0.66 [0.13-3.3]  | 0.61   | 3.22 [0.6-17.1]  | 0.17   |
| 15q11.2  | Schizophrenia spectrum disorder | 0.99 [0.71-1.36] | 0.93   | 1.32 [0.97-1.78] | 0.077  |
| PWAS     | Schizophrenia spectrum disorder | na.              | na.    | 9.19 [1.72-49.2] | 0.010  |
| 15q13.3  | Schizophrenia spectrum disorder | 3.49 [1.36-8.95] | 0.0093 | 1.44 [0.71-2.95] | 0.31   |
| 16p13.11 | Schizophrenia spectrum disorder | 2.29 [1.22-4.3]  | 0.010  | 1.98 [1.31-3]    | 0.0012 |
| 16p12.1  | Schizophrenia spectrum disorder | 1.21 [0.66-2.2]  | 0.54   | 0.48 [0.14-1.68] | 0.25   |
| 16p11.2d | Schizophrenia spectrum disorder | 2.41 [0.96-6.08] | 0.062  | 1.81 [0.81-4.04] | 0.15   |
| 16p11.2  | Schizophrenia spectrum disorder | 1.26 [0.55-2.88] | 0.58   | 1.5 [0.89-2.54]  | 0.13   |
| 17p12    | Schizophrenia spectrum disorder | 0.46 [0.13-1.65] | 0.24   | 1.17 [0.34-3.99] | 0.80   |
| 17q12    | Schizophrenia spectrum disorder | 4.84 [0.81-28.9] | 0.084  | 3.19 [1.17-8.68] | 0.023  |
| 22q11.2  | Schizophrenia spectrum disorder | 3.28 [1.15-9.3]  | 0.026  | 1.34 [0.7-2.54]  | 0.37   |
| 22q11.2b | Schizophrenia spectrum disorder | 2.6 [0.65-10.4]  | 0.18   | 2.51 [0.77-8.16] | 0.12   |

|                   |       |                   |        |
|-------------------|-------|-------------------|--------|
| 3.73 [0.48-20.44] | 0.15  | 2.8 [0.82-8.69]   | 0.08   |
| 2.35 [0.67-7.46]  | 0.16  | 2.19 [1.05-4.3]   | 0.028  |
| na.               | na.   | 2.82 [0.59-10.75] | 0.15   |
| 1.51 [0.4-4.76]   | 0.50  | 1.08 [0.57-1.93]  | 0.81   |
| 1.64 [0.61-4.15]  | 0.30  | 2.47 [1.3-4.61]   | 0.0049 |
| 8.3 [1.46-64.14]  | 0.021 | na.               | na.    |
| 1.15 [0.42-2.85]  | 0.77  | 1.5 [0.32-5.47]   | 0.56   |
| 2.21 [0.27-13.19] | 0.40  | na.               | na.    |
| 0.62 [0.09-2.6]   | 0.56  | 1.81 [0.32-9.09]  | 0.47   |
| 1.03 [0.74-1.41]  | 0.86  | 1.25 [0.92-1.67]  | 0.14   |
| na.               | na.   | 8.03 [2.48-28.41] | 0.0006 |
| 2.95 [1.19-7.39]  | 0.018 | 1.52 [0.72-3.07]  | 0.25   |
| 2.2 [1.19-4.03]   | 0.011 | 1.99 [1.31-3]     | 0.0011 |
| 1.2 [0.65-2.12]   | 0.55  | 0.45 [0.1-1.36]   | 0.21   |
| 2.03 [0.82-4.89]  | 0.12  | 2.07 [0.94-4.42]  | 0.062  |
| 1.28 [0.54-2.79]  | 0.56  | 1.86 [1.07-3.16]  | 0.024  |
| 0.48 [0.11-1.48]  | 0.25  | 1.54 [0.41-4.85]  | 0.48   |
| 3.56 [0.8-15.12]  | 0.083 | 2.92 [1.13-7.59]  | 0.025  |
| 2.41 [0.91-6.51]  | 0.077 | 1.46 [0.75-2.71]  | 0.25   |
| 2.64 [0.7-9.88]   | 0.14  | 2.75 [0.85-8.67]  | 0.08   |
